# Supplementary material
Source: MDPI journal article supplement (https://www.mdpi.com/2073-4433/13/1/62)
Supplement: s1 [file s1]

## The impact of traffic and meteorology on urban particle mass and particle number concentrations: student-led studies using mobile measurements before, during, and after the COVID-19 pandemic lockdowns

Otto Klemm, Antonia Ahrens, Margarethe Arnswald, Raika Bethke, David F. Berger, Katharina Blankenhaus, Lisa Blauth, Bettina Breuer, Sophia Buchholz, Felix Burek, Laura Ehrnsperger, Sarah Funken, Ella Henninger, Janik Hohl, Nadine Jöllenbeck, Philipp Kirgasser, Maike Kuhls, Bastian Paas, Lea A. Roters, Carsten Schaller, Hanna Schlüter

**Table S2** | results of relaimpo analysis

last update: 2021-11-26

|                                 | PN_median | PN_90percentile | PM1_median | PM1_90percentile | PM2.5_median | PM2.5_90percentile | PM10_median | PM10_90percentile |
|---------------------------------|-----------|-----------------|------------|------------------|--------------|--------------------|-------------|-------------------|
| <b>variance explained</b>       | 65.07%    | 66.82%          | 66.69%     | 64.30%           | 64.02%       | 63.54%             | 64.10%      | 78.72%            |
| <b>day_of_week</b>              | 8.6%      | 6.4%            | 12.7%      | 12.7%            | 15.0%        | 15.5%              | 16.4%       | 25.5%             |
| <b>route</b>                    | 1.8%      | 16.7%           | 0.1%       | 0.2%             | 0.3%         | 0.5%               | 0.7%        | 0.6%              |
| <b>day_of_year</b>              | 2.6%      | 2.0%            | 3.7%       | 4.3%             | 3.7%         | 5.2%               | 0.8%        | 4.6%              |
| <b>Temperature</b>              | 1.8%      | 1.2%            | 3.5%       | 3.5%             | 4.8%         | 4.2%               | 5.7%        | 2.1%              |
| <b>Relativ_Humidity</b>         | 11.2%     | 9.2%            | 4.4%       | 4.8%             | 4.5%         | 5.0%               | 5.7%        | 6.0%              |
| <b>Wind_Speed</b>               | 1.1%      | 0.8%            | 2.1%       | 1.8%             | 1.5%         | 1.4%               | 1.4%        | 5.1%              |
| <b>Wind_Direction</b>           | 7.7%      | 3.8%            | 9.7%       | 9.8%             | 9.5%         | 9.2%               | 6.7%        | 2.8%              |
| <b>Shortwave_Radiation</b>      | 5.0%      | 4.0%            | 1.3%       | 1.4%             | 1.2%         | 1.7%               | 1.4%        | 3.7%              |
| <b>Precipitation_cumulative</b> | 0.2%      | 0.2%            | 0.4%       | 0.3%             | 0.2%         | 0.2%               | 0.2%        | 5.8%              |
| <b>stability</b>                | 2.1%      | 1.5%            | 2.1%       | 2.1%             | 2.5%         | 2.7%               | 0.8%        | 0.5%              |
| <b>mean_MSGE_O3</b>             | 5.5%      | 4.6%            | 4.5%       | 4.0%             | 3.6%         | 3.4%               | 2.7%        | 1.7%              |
| <b>traffic_density</b>          | 1.0%      | 1.6%            | 5.1%       | 4.8%             | 3.5%         | 2.8%               | 6.0%        | 3.1%              |
| <b>mean_MSGE_NO</b>             | 5.0%      | 4.9%            | 1.9%       | 1.8%             | 2.5%         | 2.3%               | 1.5%        | 3.5%              |
| <b>mean_VMS2_NO</b>             | 3.2%      | 2.3%            | 4.5%       | 4.0%             | 3.2%         | 2.6%               | 3.8%        | 1.2%              |
| <b>mean_MSGE_NO2</b>            | 2.7%      | 2.6%            | 2.5%       | 2.7%             | 2.2%         | 2.5%               | 1.8%        | 2.2%              |
| <b>mean_VMS2_NO2</b>            | 1.7%      | 2.2%            | 2.4%       | 2.2%             | 2.0%         | 1.8%               | 3.4%        | 2.2%              |
| <b>summe_mean_VMS2_Nox</b>      | 4.9%      | 4.5%            | 6.9%       | 6.2%             | 5.2%         | 4.4%               | 7.2%        | 3.4%              |
| <b>summe_mean_MSGE_NOx</b>      | 7.7%      | 7.5%            | 4.5%       | 4.6%             | 4.7%         | 4.8%               | 3.2%        | 5.6%              |
| <b>mean_VMS2_PM10</b>           | 3.1%      | 1.6%            | 4.5%       | 3.0%             | 2.3%         | 1.2%               | 3.1%        | 1.6%              |
| <b>mean_MSGE_PM10</b>           | 0.8%      | 1.2%            | 1.1%       | 0.8%             | 1.6%         | 1.4%               | 2.0%        | 6.7%              |
